# Supplementary material for: CDK7 inhibitor THZ1 inhibits MCL1 synthesis and drives cholangiocarcinoma apoptosis in combination with BCL2/BCL-XL inhibitor ABT-263
Source: PubMed Central journal article supplement (PMC6688996; doi:10.1038/s41419-019-1831-7), 2019-08-09
Supplement: 41419_2019_1831_MOESM16_ESM.pdf [file 41419_2019_1831_MOESM16_ESM.pdf]

GO analysis of HUCCT1

| transcription, DNA-templated: 668 genes | regulation of transcription, DNA-templated:511 genes |
|-----------------------------------------|------------------------------------------------------|
| ENSG00000131759                         | ENSG00000171316                                      |
| ENSG00000171316                         | ENSG00000160685                                      |
| ENSG00000167981                         | ENSG00000167981                                      |
| ENSG00000183779                         | ENSG00000183779                                      |
| ENSG00000099381                         | ENSG00000099381                                      |
| ENSG00000151445                         | ENSG00000151445                                      |
| ENSG00000170619                         | ENSG00000170619                                      |
| ENSG00000109118                         | ENSG00000121417                                      |
| ENSG00000121417                         | ENSG00000167840                                      |
| ENSG00000167840                         | ENSG00000126778                                      |
| ENSG00000251369                         | ENSG00000251369                                      |
| ENSG00000176896                         | ENSG00000133884                                      |
| ENSG00000133884                         | ENSG00000171425                                      |
| ENSG00000171425                         | ENSG00000204524                                      |
| ENSG00000197757                         | ENSG00000185219                                      |
| ENSG00000204524                         | ENSG00000104903                                      |
| ENSG00000185219                         | ENSG00000160679                                      |
| ENSG00000104903                         | ENSG00000184939                                      |
| ENSG00000184939                         | ENSG00000109787                                      |
| ENSG00000169131                         | ENSG00000169131                                      |
| ENSG00000109787                         | ENSG00000136870                                      |
| ENSG00000136870                         | ENSG00000141646                                      |
| ENSG00000141646                         | ENSG00000197857                                      |
| ENSG00000197857                         | ENSG00000054598                                      |
| ENSG00000113580                         | ENSG00000113580                                      |
| ENSG00000141905                         | ENSG00000204366                                      |
| ENSG00000204366                         | ENSG00000080298                                      |
| ENSG00000080298                         | ENSG00000064195                                      |
| ENSG00000156384                         | ENSG00000204920                                      |
| ENSG00000204920                         | ENSG00000169957                                      |
| ENSG00000109381                         | ENSG00000104221                                      |
| ENSG00000196597                         | ENSG00000169955                                      |
| ENSG00000139372                         | ENSG00000196597                                      |
| ENSG00000117139                         | ENSG00000121406                                      |
| ENSG00000197019                         | ENSG00000196152                                      |
| ENSG00000170608                         | ENSG00000110851                                      |
| ENSG00000198517                         | ENSG00000054267                                      |
| ENSG00000196152                         | ENSG00000170604                                      |
| ENSG00000121406                         | ENSG00000106261                                      |
| ENSG00000132740                         | ENSG00000196150                                      |
| ENSG00000054267                         | ENSG00000163795                                      |
| ENSG00000170604                         | ENSG00000169951                                      |
| ENSG00000196150                         | ENSG00000197937                                      |
| ENSG00000106261                         | ENSG00000196793                                      |
| ENSG00000163795                         | ENSG00000198315                                      |
| ENSG00000169951                         | ENSG00000197841                                      |
| ENSG00000156983                         | ENSG00000061936                                      |
| ENSG00000137834                         | ENSG00000146278                                      |
| ENSG00000067082                         | ENSG00000157429                                      |
| ENSG00000148200                         | ENSG00000177374                                      |
| ENSG00000197937                         | ENSG00000170260                                      |
| ENSG00000196793                         | ENSG00000011332                                      |
| ENSG00000198315                         | ENSG00000197024                                      |
| ENSG00000104129                         | ENSG00000197128                                      |
| ENSG00000197841                         | ENSG00000166949                                      |
| ENSG00000160570                         | ENSG00000076108                                      |
| ENSG00000159788                         | ENSG00000173480                                      |
| ENSG00000061936                         | ENSG00000267680                                      |
| ENSG00000186350                         | ENSG00000119574                                      |

|                 |                 |
|-----------------|-----------------|
| ENSG00000124422 | ENSG00000197935 |
| ENSG00000146278 | ENSG00000197933 |
| ENSG00000157429 | ENSG00000170265 |
| ENSG00000170260 | ENSG00000106031 |
| ENSG00000177374 | ENSG00000186280 |
| ENSG00000197024 | ENSG00000139651 |
| ENSG00000011332 | ENSG00000006704 |
| ENSG00000197128 | ENSG00000136574 |
| ENSG00000103343 | ENSG00000147124 |
| ENSG00000166949 | ENSG00000020256 |
| ENSG00000173480 | ENSG00000198604 |
| ENSG00000076108 | ENSG00000171448 |
| ENSG00000267680 | ENSG00000197037 |
| ENSG00000169016 | ENSG00000235109 |
| ENSG00000167967 | ENSG00000225614 |
| ENSG00000119574 | ENSG00000205903 |
| ENSG00000197935 | ENSG00000164463 |
| ENSG00000100888 | ENSG00000186272 |
| ENSG00000170265 | ENSG00000171456 |
| ENSG00000197933 | ENSG00000170631 |
| ENSG00000106031 | ENSG00000133639 |
| ENSG00000186280 | ENSG00000124444 |
| ENSG00000157557 | ENSG00000066422 |
| ENSG00000139651 | ENSG00000147548 |
| ENSG00000006704 | ENSG00000213096 |
| ENSG00000179627 | ENSG00000166860 |
| ENSG00000198205 | ENSG00000186376 |
| ENSG00000140265 | ENSG00000196670 |
| ENSG00000186174 | ENSG00000196466 |
| ENSG00000057657 | ENSG00000102349 |
| ENSG00000033800 | ENSG00000141956 |
| ENSG00000147124 | ENSG00000197044 |
| ENSG00000020256 | ENSG00000121454 |
| ENSG00000197037 | ENSG00000147118 |
| ENSG00000171448 | ENSG00000185252 |
| ENSG00000198604 | ENSG00000179119 |
| ENSG00000204946 | ENSG00000177683 |
| ENSG00000235109 | ENSG00000005801 |
| ENSG00000225614 | ENSG00000163946 |
| ENSG00000205903 | ENSG00000197714 |
| ENSG00000164463 | ENSG00000171469 |
| ENSG00000186272 | ENSG00000171466 |
| ENSG00000144802 | ENSG00000171467 |
| ENSG00000204256 | ENSG00000125285 |
| ENSG00000171456 | ENSG00000110395 |
| ENSG00000156030 | ENSG00000081386 |
| ENSG00000170631 | ENSG00000185650 |
| ENSG00000124444 | ENSG00000196458 |
| ENSG00000066422 | ENSG00000196456 |
| ENSG00000147548 | ENSG00000131845 |
| ENSG00000213096 | ENSG00000130684 |
| ENSG00000166860 | ENSG00000198551 |
| ENSG00000186376 | ENSG00000196453 |
| ENSG00000196670 | ENSG00000180626 |
| ENSG00000164379 | ENSG00000153207 |
| ENSG00000186260 | ENSG00000189308 |
| ENSG00000102349 | ENSG00000163935 |
| ENSG00000196466 | ENSG00000183647 |
| ENSG00000141956 | ENSG00000121903 |
| ENSG00000165891 | ENSG00000249471 |
| ENSG00000197044 | ENSG00000136997 |

|                 |                 |
|-----------------|-----------------|
| ENSG00000121454 | ENSG00000186026 |
| ENSG00000147118 | ENSG00000197162 |
| ENSG00000185252 | ENSG00000156853 |
| ENSG00000179119 | ENSG00000169155 |
| ENSG00000177683 | ENSG00000139718 |
| ENSG00000005801 | ENSG00000197062 |
| ENSG00000163946 | ENSG00000172216 |
| ENSG00000135999 | ENSG00000102804 |
| ENSG00000197714 | ENSG00000186020 |
| ENSG00000171469 | ENSG00000130856 |
| ENSG00000171466 | ENSG00000101457 |
| ENSG00000125798 | ENSG00000136715 |
| ENSG00000171467 | ENSG00000215421 |
| ENSG00000204569 | ENSG00000121931 |
| ENSG00000131848 | ENSG00000181896 |
| ENSG00000198815 | ENSG00000179922 |
| ENSG00000125285 | ENSG00000105136 |
| ENSG00000158711 | ENSG00000181894 |
| ENSG00000081386 | ENSG00000141568 |
| ENSG00000196199 | ENSG00000137843 |
| ENSG00000196458 | ENSG00000197961 |
| ENSG00000196456 | ENSG00000147789 |
| ENSG00000131845 | ENSG00000186017 |
| ENSG00000130684 | ENSG00000198538 |
| ENSG00000198551 | ENSG00000186130 |
| ENSG00000196453 | ENSG00000001167 |
| ENSG00000180626 | ENSG00000162676 |
| ENSG00000155592 | ENSG00000136866 |
| ENSG00000116604 | ENSG00000101442 |
| ENSG00000189308 | ENSG00000267508 |
| ENSG00000163935 | ENSG00000007968 |
| ENSG00000183647 | ENSG00000105127 |
| ENSG00000121903 | ENSG00000055609 |
| ENSG00000177485 | ENSG00000101544 |
| ENSG00000037965 | ENSG00000254004 |
| ENSG00000249471 | ENSG00000155545 |
| ENSG00000178764 | ENSG00000101665 |
| ENSG00000101945 | ENSG00000181315 |
| ENSG00000186026 | ENSG00000183309 |
| ENSG00000197162 | ENSG00000135747 |
| ENSG00000141026 | ENSG00000172171 |
| ENSG00000087152 | ENSG00000180479 |
| ENSG00000156853 | ENSG00000152439 |
| ENSG00000169155 | ENSG00000152433 |
| ENSG00000139718 | ENSG00000196428 |
| ENSG00000197063 | ENSG00000135164 |
| ENSG00000197062 | ENSG00000135365 |
| ENSG00000186141 | ENSG00000152784 |
| ENSG00000170365 | ENSG00000197483 |
| ENSG00000172216 | ENSG00000116833 |
| ENSG00000196588 | ENSG00000116731 |
| ENSG00000186020 | ENSG00000170949 |
| ENSG00000169925 | ENSG00000196705 |
| ENSG00000130856 | ENSG00000165655 |
| ENSG00000101457 | ENSG00000048649 |
| ENSG00000077684 | ENSG00000185697 |
| ENSG00000136715 | ENSG00000152443 |
| ENSG00000129911 | ENSG00000172845 |
| ENSG00000215421 | ENSG00000105556 |
| ENSG00000121931 | ENSG00000171940 |
| ENSG00000181896 | ENSG00000196417 |

|                 |                 |
|-----------------|-----------------|
| ENSG00000105136 | ENSG00000165512 |
| ENSG00000179922 | ENSG00000170100 |
| ENSG00000170684 | ENSG00000198879 |
| ENSG00000181894 | ENSG00000174197 |
| ENSG00000102984 | ENSG00000143842 |
| ENSG00000197961 | ENSG00000205189 |
| ENSG00000112200 | ENSG00000181638 |
| ENSG00000147789 | ENSG00000130803 |
| ENSG00000198538 | ENSG00000155760 |
| ENSG00000186017 | ENSG00000019485 |
| ENSG00000186130 | ENSG00000171970 |
| ENSG00000048052 | ENSG00000172977 |
| ENSG00000141570 | ENSG00000177463 |
| ENSG00000185129 | ENSG00000169184 |
| ENSG00000162676 | ENSG00000116990 |
| ENSG00000136866 | ENSG00000130818 |
| ENSG00000101442 | ENSG00000016082 |
| ENSG00000267508 | ENSG00000025293 |
| ENSG00000150907 | ENSG00000178691 |
| ENSG00000118482 | ENSG00000061273 |
| ENSG00000196843 | ENSG00000218891 |
| ENSG00000055609 | ENSG00000213799 |
| ENSG00000105127 | ENSG00000185670 |
| ENSG00000101544 | ENSG00000172262 |
| ENSG00000166135 | ENSG00000204859 |
| ENSG00000254004 | ENSG00000151014 |
| ENSG00000155545 | ENSG00000118260 |
| ENSG00000101665 | ENSG00000091656 |
| ENSG00000181315 | ENSG00000213588 |
| ENSG00000183309 | ENSG00000129474 |
| ENSG00000143867 | ENSG00000171574 |
| ENSG00000180479 | ENSG00000171988 |
| ENSG00000152439 | ENSG00000155508 |
| ENSG00000152433 | ENSG00000010539 |
| ENSG00000135164 | ENSG00000189079 |
| ENSG00000135365 | ENSG00000164048 |
| ENSG00000152784 | ENSG00000148300 |
| ENSG00000013619 | ENSG00000172273 |
| ENSG00000197483 | ENSG00000169981 |
| ENSG00000116833 | ENSG00000173276 |
| ENSG00000095787 | ENSG00000078246 |
| ENSG00000163159 | ENSG00000173275 |
| ENSG00000116731 | ENSG00000125482 |
| ENSG00000170949 | ENSG00000171161 |
| ENSG00000196705 | ENSG00000171163 |
| ENSG00000165655 | ENSG00000011258 |
| ENSG00000148143 | ENSG00000140382 |
| ENSG00000152443 | ENSG00000197782 |
| ENSG00000234602 | ENSG00000165417 |
| ENSG00000172845 | ENSG00000196757 |
| ENSG00000105556 | ENSG00000182986 |
| ENSG00000182742 | ENSG00000166188 |
| ENSG00000179456 | ENSG00000196652 |
| ENSG00000171940 | ENSG00000105497 |
| ENSG00000196417 | ENSG00000267041 |
| ENSG00000135457 | ENSG00000122386 |
| ENSG00000165512 | ENSG00000182318 |
| ENSG00000168395 | ENSG00000169375 |
| ENSG00000170100 | ENSG00000177200 |
| ENSG00000145041 | ENSG00000173120 |
| ENSG00000068654 | ENSG00000185591 |

|                 |                 |
|-----------------|-----------------|
| ENSG00000105229 | ENSG00000122482 |
| ENSG00000173011 | ENSG00000197385 |
| ENSG00000174197 | ENSG00000198728 |
| ENSG00000143842 | ENSG00000204604 |
| ENSG00000205189 | ENSG00000097007 |
| ENSG00000078403 | ENSG00000196781 |
| ENSG00000181638 | ENSG00000112584 |
| ENSG00000130803 | ENSG00000124201 |
| ENSG00000079432 | ENSG00000213762 |
| ENSG00000019485 | ENSG00000181220 |
| ENSG00000171970 | ENSG00000197279 |
| ENSG00000172977 | ENSG00000189266 |
| ENSG00000177463 | ENSG00000204519 |
| ENSG00000163635 | ENSG00000100395 |
| ENSG00000117713 | ENSG00000006432 |
| ENSG00000078900 | ENSG00000214029 |
| ENSG00000169184 | ENSG00000117000 |
| ENSG00000108175 | ENSG00000106479 |
| ENSG00000096717 | ENSG00000177426 |
| ENSG00000169635 | ENSG00000164011 |
| ENSG00000166261 | ENSG00000204611 |
| ENSG00000130818 | ENSG00000103199 |
| ENSG00000025293 | ENSG00000158636 |
| ENSG00000178691 | ENSG00000181555 |
| ENSG00000148737 | ENSG00000152518 |
| ENSG00000061273 | ENSG00000204514 |
| ENSG00000218891 | ENSG00000102870 |
| ENSG00000213799 | ENSG00000160094 |
| ENSG00000185670 | ENSG00000175213 |
| ENSG00000172262 | ENSG00000156650 |
| ENSG00000204859 | ENSG00000117751 |
| ENSG00000198890 | ENSG00000163877 |
| ENSG00000091656 | ENSG00000197363 |
| ENSG00000198894 | ENSG00000163872 |
| ENSG00000117036 | ENSG00000197362 |
| ENSG00000189298 | ENSG00000148835 |
| ENSG00000118263 | ENSG00000171295 |
| ENSG00000213588 | ENSG00000134138 |
| ENSG00000129474 | ENSG00000146587 |
| ENSG00000171574 | ENSG00000028839 |
| ENSG00000059728 | ENSG00000173041 |
| ENSG00000171988 | ENSG00000160199 |
| ENSG00000132275 | ENSG00000071243 |
| ENSG00000155508 | ENSG00000161914 |
| ENSG00000010539 | ENSG00000168310 |
| ENSG00000030419 | ENSG00000263002 |
| ENSG00000189079 | ENSG00000149050 |
| ENSG00000172273 | ENSG00000115289 |
| ENSG00000162714 | ENSG00000160062 |
| ENSG00000197256 | ENSG00000168813 |
| ENSG00000169981 | ENSG00000178229 |
| ENSG00000173276 | ENSG00000009954 |
| ENSG00000173275 | ENSG00000153767 |
| ENSG00000171161 | ENSG00000113658 |
| ENSG00000171163 | ENSG00000005339 |
| ENSG00000125484 | ENSG00000198093 |
| ENSG00000128604 | ENSG00000167562 |
| ENSG00000011258 | ENSG00000137338 |
| ENSG00000172818 | ENSG00000086712 |
| ENSG00000179588 | ENSG00000167565 |
| ENSG00000116044 | ENSG00000168286 |

|                 |                 |
|-----------------|-----------------|
| ENSG00000140382 | ENSG00000171634 |
| ENSG00000197782 | ENSG00000159882 |
| ENSG00000174282 | ENSG00000143157 |
| ENSG00000196757 | ENSG00000159885 |
| ENSG00000182986 | ENSG00000148400 |
| ENSG00000261221 | ENSG00000048405 |
| ENSG00000166188 | ENSG00000084093 |
| ENSG00000196652 | ENSG00000189042 |
| ENSG00000105497 | ENSG00000173068 |
| ENSG00000162711 | ENSG00000133250 |
| ENSG00000267041 | ENSG00000120832 |
| ENSG00000122386 | ENSG00000010818 |
| ENSG00000182318 | ENSG00000036549 |
| ENSG00000169375 | ENSG00000124813 |
| ENSG00000180530 | ENSG00000160993 |
| ENSG00000116580 | ENSG00000070495 |
| ENSG00000177200 | ENSG00000133247 |
| ENSG00000173120 | ENSG00000134107 |
| ENSG00000132005 | ENSG00000163349 |
| ENSG00000122482 | ENSG00000146757 |
| ENSG00000197385 | ENSG00000161526 |
| ENSG00000198728 | ENSG00000075292 |
| ENSG00000204604 | ENSG00000178386 |
| ENSG00000162601 | ENSG00000168556 |
| ENSG00000172943 | ENSG00000158691 |
| ENSG00000196781 | ENSG00000124151 |
| ENSG00000112584 | ENSG00000187626 |
| ENSG00000163166 | ENSG00000197566 |
| ENSG00000148297 | ENSG00000189120 |
| ENSG00000213762 | ENSG00000101096 |
| ENSG00000148840 | ENSG00000142528 |
| ENSG00000183337 | ENSG00000188785 |
| ENSG00000181220 | ENSG00000205683 |
| ENSG00000013503 | ENSG00000234444 |
| ENSG00000197279 | ENSG00000185278 |
| ENSG00000155666 | ENSG00000118707 |
| ENSG00000224470 | ENSG00000198182 |
| ENSG00000204519 | ENSG00000131931 |
| ENSG00000189266 | ENSG00000096654 |
| ENSG00000100395 | ENSG00000112365 |
| ENSG00000006432 | ENSG00000137574 |
| ENSG00000117000 | ENSG00000161551 |
| ENSG00000214029 | ENSG00000168564 |
| ENSG00000106479 | ENSG00000168661 |
| ENSG00000177426 | ENSG00000124160 |
| ENSG00000204611 | ENSG00000184677 |
| ENSG00000221869 | ENSG00000142409 |
| ENSG00000148411 | ENSG00000269343 |
| ENSG00000103199 | ENSG00000172493 |
| ENSG00000181690 | ENSG00000142556 |
| ENSG00000135111 | ENSG00000152382 |
| ENSG00000171681 | ENSG00000131115 |
| ENSG00000158636 | ENSG00000118412 |
| ENSG00000137504 | ENSG00000198298 |
| ENSG00000160094 | ENSG00000173875 |
| ENSG00000102870 | ENSG00000143067 |
| ENSG00000156650 | ENSG00000143970 |
| ENSG00000175213 | ENSG00000155846 |
| ENSG00000204713 | ENSG00000006194 |
| ENSG00000117751 | ENSG00000176024 |
| ENSG00000197363 | ENSG00000187607 |

|                 |                 |
|-----------------|-----------------|
| ENSG00000197362 | ENSG00000171606 |
| ENSG00000171295 | ENSG00000152475 |
| ENSG00000143614 | ENSG00000143373 |
| ENSG00000197323 | ENSG00000187792 |
| ENSG00000146587 | ENSG00000115568 |
| ENSG00000171056 | ENSG00000114853 |
| ENSG00000173041 | ENSG00000196700 |
| ENSG00000071243 | ENSG00000107104 |
| ENSG00000161914 | ENSG00000064932 |
| ENSG00000168826 | ENSG00000144747 |
| ENSG00000113645 | ENSG00000185024 |
| ENSG00000078699 | ENSG00000198026 |
| ENSG00000263002 | ENSG00000100207 |
| ENSG00000149050 | ENSG00000158161 |
| ENSG00000173894 | ENSG00000159917 |
| ENSG00000115289 | ENSG00000175691 |
| ENSG00000160062 | ENSG00000143498 |
| ENSG00000168813 | ENSG00000125945 |
| ENSG00000178229 | ENSG00000124782 |
| ENSG00000043355 | ENSG00000175197 |
| ENSG00000009954 | ENSG00000166526 |
| ENSG00000070476 | ENSG00000166529 |
| ENSG00000113658 | ENSG00000125846 |
| ENSG00000198093 | ENSG00000125845 |
| ENSG00000148606 | ENSG00000213020 |
| ENSG00000019549 | ENSG00000101040 |
| ENSG00000167562 | ENSG00000083817 |
| ENSG00000086712 | ENSG00000083812 |
| ENSG00000167565 | ENSG00000196812 |
| ENSG00000184436 | ENSG00000157657 |
| ENSG00000168286 | ENSG00000138767 |
| ENSG00000171634 | ENSG00000140836 |
| ENSG00000159882 | ENSG00000168795 |
| ENSG00000159885 | ENSG00000180855 |
| ENSG00000048405 | ENSG00000204209 |
| ENSG00000084093 | ENSG00000111596 |
| ENSG00000189042 | ENSG00000137075 |
| ENSG00000173068 | ENSG00000196345 |
| ENSG00000159388 | ENSG00000136504 |
| ENSG00000133250 | ENSG00000151612 |
| ENSG00000056277 | ENSG00000186918 |
| ENSG00000120832 | ENSG00000083828 |
| ENSG00000036549 | ENSG00000107882 |
| ENSG00000160993 | ENSG00000020577 |
| ENSG00000070495 | ENSG00000196110 |
| ENSG00000068024 | ENSG00000167384 |
| ENSG00000133247 | ENSG00000198455 |
| ENSG00000134107 | ENSG00000185947 |
| ENSG00000163349 | ENSG00000177045 |
| ENSG00000008083 | ENSG00000137185 |
| ENSG00000146757 | ENSG00000130544 |
| ENSG00000161526 | ENSG00000256087 |
| ENSG00000162702 | ENSG00000131051 |
| ENSG00000176396 | ENSG00000196214 |
| ENSG00000075292 | ENSG00000198040 |
| ENSG00000178386 | ENSG00000151090 |
| ENSG00000168062 | ENSG00000178935 |
| ENSG00000140577 | ENSG00000167657 |
| ENSG00000168556 | ENSG00000144354 |
| ENSG00000058600 | ENSG00000256294 |
| ENSG00000135334 | ENSG00000203326 |

|                 |                 |
|-----------------|-----------------|
| ENSG0000071282  | ENSG00000180884 |
| ENSG00000158691 | ENSG00000127663 |
| ENSG00000124151 | ENSG00000160908 |
| ENSG00000184402 | ENSG00000179943 |
| ENSG00000187626 | ENSG00000067646 |
| ENSG00000197566 | ENSG00000167395 |
| ENSG00000101191 | ENSG00000170325 |
| ENSG00000189120 | ENSG00000198466 |
| ENSG00000123411 | ENSG00000167394 |
| ENSG00000063978 | ENSG00000170322 |
| ENSG00000188785 | ENSG00000186812 |
| ENSG00000205683 | ENSG00000167785 |
| ENSG00000234444 | ENSG00000079999 |
| ENSG00000118707 | ENSG00000183621 |
| ENSG00000185278 | ENSG00000100105 |
| ENSG00000198182 | ENSG00000088876 |
| ENSG00000131931 | ENSG00000100109 |
| ENSG00000096654 | ENSG00000081189 |
| ENSG00000115641 | ENSG00000114933 |
| ENSG00000137574 | ENSG00000177873 |
| ENSG00000112365 | ENSG00000126746 |
| ENSG00000065526 | ENSG00000105732 |
| ENSG00000161551 | ENSG00000174652 |
| ENSG00000125812 | ENSG00000197619 |
| ENSG00000124160 | ENSG00000167637 |
| ENSG00000168661 | ENSG00000177125 |
| ENSG00000143190 | ENSG00000196378 |
| ENSG00000184677 | ENSG00000167635 |
| ENSG00000142409 | ENSG00000185730 |
| ENSG00000143258 | ENSG00000063438 |
| ENSG00000115548 | ENSG00000131263 |
| ENSG00000129315 | ENSG00000176476 |
| ENSG00000142556 | ENSG00000198105 |
| ENSG00000198081 | ENSG00000183742 |
| ENSG00000101076 | ENSG00000005889 |
| ENSG00000152382 | ENSG00000131061 |
| ENSG00000131115 | ENSG00000113812 |
| ENSG00000118412 | ENSG00000178917 |
| ENSG00000140548 | ENSG00000114315 |
| ENSG00000114861 | ENSG00000124459 |
| ENSG00000198298 | ENSG00000151623 |
| ENSG00000173875 | ENSG00000180035 |
| ENSG00000174306 | ENSG00000186448 |
| ENSG00000143067 | ENSG00000186300 |
| ENSG00000143970 | ENSG00000140987 |
| ENSG00000006194 | ENSG00000167034 |
| ENSG00000205659 | ENSG00000167625 |
| ENSG00000157933 | ENSG00000196387 |
| ENSG00000143379 | ENSG00000112983 |
| ENSG00000176024 | ENSG00000083168 |
| ENSG00000164916 | ENSG00000123095 |
| ENSG00000187607 | ENSG00000105997 |
| ENSG00000171606 | ENSG00000204335 |
| ENSG00000152475 | ENSG00000118620 |
| ENSG00000143373 | ENSG00000144597 |
| ENSG00000187792 | ENSG00000140332 |
| ENSG00000171604 | ENSG00000111424 |
| ENSG00000167685 | ENSG00000105619 |
| ENSG00000165244 | ENSG00000196357 |
| ENSG00000115568 | ENSG00000198393 |
| ENSG00000114853 | ENSG00000105991 |



|                 |                 |
|-----------------|-----------------|
| ENSG00000196700 | ENSG00000140992 |
| ENSG00000107104 | ENSG00000123636 |
| ENSG00000080603 | ENSG00000124766 |
| ENSG00000064932 | ENSG00000085185 |
| ENSG00000109971 | ENSG00000196391 |
| ENSG00000128908 | ENSG00000089335 |
| ENSG00000179833 | ENSG00000164442 |
| ENSG00000198026 | ENSG00000144791 |
| ENSG00000100207 | ENSG00000236104 |
| ENSG00000100201 | ENSG00000117222 |
| ENSG00000158161 | ENSG00000177842 |
| ENSG00000159917 | ENSG00000077092 |
| ENSG00000175691 | ENSG00000167548 |
| ENSG00000125945 | ENSG00000164631 |
| ENSG00000256060 | ENSG00000127989 |
| ENSG00000168517 | ENSG00000136630 |
| ENSG00000178951 | ENSG00000197608 |
| ENSG00000175197 | ENSG00000180938 |
| ENSG00000170689 | ENSG00000085276 |
| ENSG00000172466 | ENSG00000062370 |
| ENSG00000117318 | ENSG00000085274 |
| ENSG00000167771 | ENSG00000100625 |
| ENSG00000166526 | ENSG00000101126 |
| ENSG00000166529 | ENSG00000105708 |
| ENSG00000150347 | ENSG00000187815 |
| ENSG00000125846 |                 |
| ENSG00000204304 |                 |
| ENSG00000213020 |                 |
| ENSG00000198146 |                 |
| ENSG00000083817 |                 |
| ENSG00000083812 |                 |
| ENSG00000175745 |                 |
| ENSG00000105821 |                 |
| ENSG00000120616 |                 |
| ENSG00000113916 |                 |
| ENSG00000157657 |                 |
| ENSG00000196812 |                 |
| ENSG00000124496 |                 |
| ENSG00000140320 |                 |
| ENSG00000138767 |                 |
| ENSG00000168795 |                 |
| ENSG00000165671 |                 |
| ENSG00000180855 |                 |
| ENSG00000204209 |                 |
| ENSG00000213024 |                 |
| ENSG00000111596 |                 |
| ENSG00000196345 |                 |
| ENSG00000136504 |                 |
| ENSG00000186416 |                 |
| ENSG00000151612 |                 |
| ENSG00000066135 |                 |
| ENSG00000083828 |                 |
| ENSG00000186918 |                 |
| ENSG00000215271 |                 |
| ENSG00000089902 |                 |
| ENSG00000119608 |                 |
| ENSG00000196110 |                 |
| ENSG00000167384 |                 |
| ENSG00000185947 |                 |
| ENSG00000198455 |                 |
| ENSG00000177045 |                 |

|                 |  |
|-----------------|--|
| ENSG00000137185 |  |
| ENSG00000130544 |  |
| ENSG00000256087 |  |
| ENSG00000125968 |  |
| ENSG00000131051 |  |
| ENSG00000196214 |  |
| ENSG00000198040 |  |
| ENSG00000151090 |  |
| ENSG00000178935 |  |
| ENSG00000167657 |  |
| ENSG00000149308 |  |
| ENSG00000144354 |  |
| ENSG00000112242 |  |
| ENSG00000256294 |  |
| ENSG00000104064 |  |
| ENSG00000203326 |  |
| ENSG00000180884 |  |
| ENSG00000083838 |  |
| ENSG00000160908 |  |
| ENSG00000127663 |  |
| ENSG00000141582 |  |
| ENSG00000067646 |  |
| ENSG00000179943 |  |
| ENSG00000167395 |  |
| ENSG00000170325 |  |
| ENSG00000167394 |  |
| ENSG00000198466 |  |
| ENSG00000186812 |  |
| ENSG00000167785 |  |
| ENSG00000079999 |  |
| ENSG00000183814 |  |
| ENSG00000183621 |  |
| ENSG00000088876 |  |
| ENSG00000100105 |  |
| ENSG00000081189 |  |
| ENSG00000114933 |  |
| ENSG00000177873 |  |
| ENSG00000005483 |  |
| ENSG00000126368 |  |
| ENSG00000105732 |  |
| ENSG00000126746 |  |
| ENSG00000139154 |  |
| ENSG00000174652 |  |
| ENSG00000197619 |  |
| ENSG00000167637 |  |
| ENSG00000177125 |  |
| ENSG00000196378 |  |
| ENSG00000160633 |  |
| ENSG00000185730 |  |
| ENSG00000063438 |  |
| ENSG00000183741 |  |
| ENSG00000131263 |  |
| ENSG00000105866 |  |
| ENSG00000176476 |  |
| ENSG00000198105 |  |
| ENSG00000167528 |  |
| ENSG00000183742 |  |
| ENSG00000005889 |  |
| ENSG00000179862 |  |
| ENSG00000104881 |  |
| ENSG00000131061 |  |

|                 |  |
|-----------------|--|
| ENSG00000153922 |  |
| ENSG00000113812 |  |
| ENSG00000197905 |  |
| ENSG00000114315 |  |
| ENSG00000151623 |  |
| ENSG00000180035 |  |
| ENSG00000186448 |  |
| ENSG00000186300 |  |
| ENSG00000140987 |  |
| ENSG00000167034 |  |
| ENSG00000176678 |  |
| ENSG00000167625 |  |
| ENSG00000105722 |  |
| ENSG00000196387 |  |
| ENSG00000112983 |  |
| ENSG00000121671 |  |
| ENSG00000186834 |  |
| ENSG00000176182 |  |
| ENSG00000166886 |  |
| ENSG00000083168 |  |
| ENSG00000049246 |  |
| ENSG00000177853 |  |
| ENSG00000123095 |  |
| ENSG00000105997 |  |
| ENSG00000204335 |  |
| ENSG00000118620 |  |
| ENSG00000144597 |  |
| ENSG00000140332 |  |
| ENSG00000111424 |  |
| ENSG00000105619 |  |
| ENSG00000198393 |  |
| ENSG00000196357 |  |
| ENSG00000105991 |  |
| ENSG00000140992 |  |
| ENSG00000123636 |  |
| ENSG00000105085 |  |
| ENSG00000085185 |  |
| ENSG00000196391 |  |
| ENSG00000089335 |  |
| ENSG00000164442 |  |
| ENSG00000178409 |  |
| ENSG00000144791 |  |
| ENSG00000236104 |  |
| ENSG00000117222 |  |
| ENSG00000177842 |  |
| ENSG00000077092 |  |
| ENSG00000167548 |  |
| ENSG00000164631 |  |
| ENSG00000136630 |  |
| ENSG00000127528 |  |
| ENSG00000197608 |  |
| ENSG00000180938 |  |
| ENSG00000085276 |  |
| ENSG00000062370 |  |
| ENSG00000085274 |  |
| ENSG00000101126 |  |
| ENSG00000172530 |  |
| ENSG00000101255 |  |
| ENSG00000105708 |  |
| ENSG00000187815 |  |
