# Supplementary material for: CDK7 inhibitor THZ1 inhibits MCL1 synthesis and drives cholangiocarcinoma apoptosis in combination with BCL2/BCL-XL inhibitor ABT-263
Source: PubMed Central journal article supplement (PMC6688996; doi:10.1038/s41419-019-1831-7), 2019-08-09
Supplement: 41419_2019_1831_MOESM17_ESM.pdf [file 41419_2019_1831_MOESM17_ESM.pdf]

GO analysis of HuH28

| transcription, DNA-templated: 263 genes | regulation of transcription, DNA-templated: 219 genes |
|-----------------------------------------|-------------------------------------------------------|
| ENSG00000146587                         | ENSG00000146587                                       |
| ENSG00000131759                         | ENSG00000173041                                       |
| ENSG00000173041                         | ENSG00000167981                                       |
| ENSG00000167981                         | ENSG00000161914                                       |
| ENSG00000168826                         | ENSG00000099381                                       |
| ENSG00000161914                         | ENSG00000167840                                       |
| ENSG00000099381                         | ENSG00000251369                                       |
| ENSG00000167840                         | ENSG00000171425                                       |
| ENSG00000251369                         | ENSG00000185219                                       |
| ENSG00000171425                         | ENSG00000168310                                       |
| ENSG00000185219                         | ENSG00000263002                                       |
| ENSG00000263002                         | ENSG00000160679                                       |
| ENSG00000184939                         | ENSG00000184939                                       |
| ENSG00000109787                         | ENSG00000109787                                       |
| ENSG00000136870                         | ENSG00000136870                                       |
| ENSG00000197857                         | ENSG00000197857                                       |
| ENSG00000204366                         | ENSG00000204366                                       |
| ENSG00000173894                         | ENSG00000204920                                       |
| ENSG00000156384                         | ENSG00000104221                                       |
| ENSG00000204920                         | ENSG00000169955                                       |
| ENSG00000178229                         | ENSG00000178229                                       |
| ENSG00000196152                         | ENSG00000153767                                       |
| ENSG00000121406                         | ENSG00000196152                                       |
| ENSG00000170604                         | ENSG00000121406                                       |
| ENSG00000148606                         | ENSG00000110851                                       |
| ENSG00000106261                         | ENSG00000170604                                       |
| ENSG00000198093                         | ENSG00000106261                                       |
| ENSG00000196150                         | ENSG00000198093                                       |
| ENSG00000169951                         | ENSG00000196150                                       |
| ENSG00000167562                         | ENSG00000169951                                       |
| ENSG00000197937                         | ENSG00000167562                                       |
| ENSG00000198315                         | ENSG00000197937                                       |
| ENSG00000197841                         | ENSG00000198315                                       |
| ENSG00000184436                         | ENSG00000197841                                       |
| ENSG00000061936                         | ENSG00000061936                                       |
| ENSG00000157429                         | ENSG00000143157                                       |
| ENSG00000146278                         | ENSG00000157429                                       |
| ENSG00000170260                         | ENSG00000146278                                       |
| ENSG00000197024                         | ENSG00000170260                                       |
| ENSG00000197128                         | ENSG00000197024                                       |
| ENSG00000103343                         | ENSG00000197128                                       |
| ENSG00000173480                         | ENSG00000173480                                       |
| ENSG00000119574                         | ENSG00000119574                                       |
| ENSG00000170265                         | ENSG00000170265                                       |
| ENSG00000197933                         | ENSG00000197933                                       |
| ENSG00000133250                         | ENSG00000133250                                       |
| ENSG00000056277                         | ENSG00000120832                                       |
| ENSG00000186280                         | ENSG00000186280                                       |
| ENSG00000120832                         | ENSG00000139651                                       |
| ENSG00000139651                         | ENSG00000136574                                       |
| ENSG00000179627                         | ENSG00000160993                                       |
| ENSG00000198205                         | ENSG00000147124                                       |
| ENSG00000140265                         | ENSG00000171448                                       |
| ENSG00000147124                         | ENSG00000197037                                       |
| ENSG00000160993                         | ENSG00000198604                                       |
| ENSG00000197037                         | ENSG00000070495                                       |
| ENSG00000171448                         | ENSG00000133247                                       |
| ENSG00000198604                         | ENSG00000235109                                       |
| ENSG00000070495                         | ENSG00000186272                                       |

|                |                |
|----------------|----------------|
| ENSG0000068024 | ENSG0000170631 |
| ENSG0000133247 | ENSG0000124444 |
| ENSG0000235109 | ENSG0000178386 |
| ENSG0000186272 | ENSG0000213096 |
| ENSG0000144802 | ENSG0000196670 |
| ENSG0000170631 | ENSG0000196466 |
| ENSG0000124444 | ENSG0000141956 |
| ENSG0000178386 | ENSG0000158691 |
| ENSG0000168062 | ENSG0000197044 |
| ENSG0000213096 | ENSG0000121454 |
| ENSG0000196670 | ENSG0000187626 |
| ENSG0000164379 | ENSG0000185252 |
| ENSG0000186260 | ENSG0000197566 |
| ENSG0000196466 | ENSG0000005801 |
| ENSG0000141956 | ENSG0000101096 |
| ENSG0000197044 | ENSG0000142528 |
| ENSG0000158691 | ENSG0000188785 |
| ENSG0000121454 | ENSG0000205683 |
| ENSG0000187626 | ENSG0000185278 |
| ENSG0000185252 | ENSG0000118707 |
| ENSG0000197566 | ENSG0000081386 |
| ENSG0000005801 | ENSG0000198182 |
| ENSG0000123411 | ENSG0000131931 |
| ENSG0000188785 | ENSG0000196456 |
| ENSG0000205683 | ENSG0000112365 |
| ENSG0000204569 | ENSG0000168564 |
| ENSG0000185278 | ENSG0000161551 |
| ENSG0000118707 | ENSG0000198551 |
| ENSG0000081386 | ENSG0000124160 |
| ENSG0000198182 | ENSG0000168661 |
| ENSG0000131931 | ENSG0000184677 |
| ENSG0000196456 | ENSG0000180626 |
| ENSG0000112365 | ENSG0000153207 |
| ENSG0000125812 | ENSG0000121903 |
| ENSG0000065526 | ENSG0000249471 |
| ENSG0000161551 | ENSG0000156853 |
| ENSG0000124160 | ENSG0000139718 |
| ENSG0000168661 | ENSG0000197062 |
| ENSG0000198551 | ENSG0000102804 |
| ENSG0000180626 | ENSG0000118412 |
| ENSG0000184677 | ENSG0000198298 |
| ENSG0000155592 | ENSG0000173875 |
| ENSG0000121903 | ENSG0000215421 |
| ENSG0000177485 | ENSG0000179922 |
| ENSG0000198081 | ENSG0000181896 |
| ENSG0000249471 | ENSG0000143067 |
| ENSG0000178764 | ENSG0000143970 |
| ENSG0000101945 | ENSG0000147789 |
| ENSG0000141026 | ENSG0000198538 |
| ENSG0000156853 | ENSG0000176024 |
| ENSG0000087152 | ENSG0000186130 |
| ENSG0000139718 | ENSG0000171606 |
| ENSG0000197062 | ENSG0000187792 |
| ENSG0000186141 | ENSG0000143373 |
| ENSG0000118412 | ENSG0000115568 |
| ENSG0000198298 | ENSG0000136866 |
| ENSG0000173875 | ENSG0000267508 |
| ENSG0000215421 | ENSG0000064932 |
| ENSG0000179922 | ENSG0000254004 |
| ENSG0000181896 | ENSG0000181315 |
| ENSG0000143067 | ENSG0000183309 |

|                 |                 |
|-----------------|-----------------|
| ENSG00000143970 | ENSG00000172171 |
| ENSG00000147789 | ENSG00000143498 |
| ENSG00000198538 | ENSG00000125945 |
| ENSG00000176024 | ENSG00000152439 |
| ENSG00000143379 | ENSG00000152433 |
| ENSG00000164916 | ENSG00000175197 |
| ENSG00000205659 | ENSG00000166526 |
| ENSG00000186130 | ENSG00000125846 |
| ENSG00000171606 | ENSG00000152784 |
| ENSG00000187792 | ENSG00000083817 |
| ENSG00000143373 | ENSG00000083812 |
| ENSG00000167685 | ENSG00000116833 |
| ENSG00000115568 | ENSG00000196812 |
| ENSG00000136866 | ENSG00000196705 |
| ENSG00000267508 | ENSG00000168795 |
| ENSG00000064932 | ENSG00000152443 |
| ENSG00000254004 | ENSG00000105556 |
| ENSG00000181315 | ENSG00000180855 |
| ENSG00000183309 | ENSG00000111596 |
| ENSG00000100201 | ENSG00000196345 |
| ENSG00000125945 | ENSG00000174197 |
| ENSG00000152439 | ENSG00000083828 |
| ENSG00000256060 | ENSG00000177045 |
| ENSG00000152433 | ENSG00000155760 |
| ENSG00000178951 | ENSG00000137185 |
| ENSG00000175197 | ENSG00000196214 |
| ENSG00000168517 | ENSG00000178935 |
| ENSG00000166526 | ENSG00000172977 |
| ENSG00000125846 | ENSG00000256294 |
| ENSG00000204304 | ENSG00000180884 |
| ENSG00000152784 | ENSG00000203326 |
| ENSG00000083817 | ENSG00000179943 |
| ENSG00000083812 | ENSG00000167395 |
| ENSG00000013619 | ENSG00000169184 |
| ENSG00000116833 | ENSG00000198466 |
| ENSG00000196812 | ENSG00000186812 |
| ENSG00000196705 | ENSG00000167785 |
| ENSG00000168795 | ENSG00000079999 |
| ENSG00000152443 | ENSG00000218891 |
| ENSG00000105556 | ENSG00000213799 |
| ENSG00000180855 | ENSG00000185670 |
| ENSG00000213024 | ENSG00000204859 |
| ENSG00000111596 | ENSG00000100105 |
| ENSG00000196345 | ENSG00000118260 |
| ENSG00000068654 | ENSG00000081189 |
| ENSG00000174197 | ENSG00000213588 |
| ENSG00000066135 | ENSG00000171574 |
| ENSG00000083828 | ENSG00000177873 |
| ENSG00000215271 | ENSG00000010539 |
| ENSG00000177045 | ENSG00000148300 |
| ENSG00000137185 | ENSG00000172273 |
| ENSG00000196214 | ENSG00000169981 |
| ENSG00000178935 | ENSG00000173276 |
| ENSG00000149308 | ENSG00000078246 |
| ENSG00000172977 | ENSG00000171161 |
| ENSG00000256294 | ENSG00000196378 |
| ENSG00000180884 | ENSG00000167635 |
| ENSG00000203326 | ENSG00000185730 |
| ENSG00000083838 | ENSG00000063438 |
| ENSG00000179943 | ENSG00000197782 |
| ENSG00000167395 | ENSG00000198105 |

|                 |                 |
|-----------------|-----------------|
| ENSG0000078900  | ENSG00000196757 |
| ENSG00000169184 | ENSG00000182986 |
| ENSG00000108175 | ENSG00000124459 |
| ENSG00000166261 | ENSG00000196652 |
| ENSG00000198466 | ENSG00000166188 |
| ENSG00000186812 | ENSG00000180035 |
| ENSG00000167785 | ENSG00000186448 |
| ENSG00000079999 | ENSG00000105497 |
| ENSG00000218891 | ENSG00000186300 |
| ENSG00000213799 | ENSG00000122386 |
| ENSG00000185670 | ENSG00000140987 |
| ENSG00000204859 | ENSG00000167034 |
| ENSG00000100105 | ENSG00000167625 |
| ENSG00000198890 | ENSG00000185591 |
| ENSG00000189298 | ENSG00000197385 |
| ENSG00000118263 | ENSG00000123095 |
| ENSG00000213588 | ENSG00000112584 |
| ENSG00000081189 | ENSG00000124201 |
| ENSG00000171574 | ENSG00000111424 |
| ENSG00000177873 | ENSG00000196357 |
| ENSG00000010539 | ENSG00000123636 |
| ENSG00000172273 | ENSG00000197279 |
| ENSG00000169981 | ENSG00000189266 |
| ENSG00000173276 | ENSG00000236104 |
| ENSG00000171161 | ENSG00000214029 |
| ENSG00000196378 | ENSG00000144791 |
| ENSG00000185730 | ENSG00000106479 |
| ENSG00000179588 | ENSG00000164011 |
| ENSG00000063438 | ENSG00000167548 |
| ENSG00000183741 | ENSG00000103199 |
| ENSG00000105866 | ENSG00000127989 |
| ENSG00000197782 | ENSG00000160094 |
| ENSG00000174282 | ENSG00000102870 |
| ENSG00000198105 | ENSG00000085276 |
| ENSG00000167528 | ENSG00000085274 |
| ENSG00000196757 | ENSG00000197363 |
| ENSG00000153922 | ENSG00000197362 |
| ENSG00000182986 | ENSG00000171295 |
| ENSG00000196652 |                 |
| ENSG00000166188 |                 |
| ENSG00000186448 |                 |
| ENSG00000180035 |                 |
| ENSG00000105497 |                 |
| ENSG00000186300 |                 |
| ENSG00000122386 |                 |
| ENSG00000140987 |                 |
| ENSG00000167034 |                 |
| ENSG00000116580 |                 |
| ENSG00000167625 |                 |
| ENSG00000132005 |                 |
| ENSG00000176182 |                 |
| ENSG00000197385 |                 |
| ENSG00000166886 |                 |
| ENSG00000177853 |                 |
| ENSG00000123095 |                 |
| ENSG00000112584 |                 |
| ENSG00000111424 |                 |
| ENSG00000148297 |                 |
| ENSG00000196357 |                 |
| ENSG00000123636 |                 |
| ENSG00000197279 |                 |

|                 |  |
|-----------------|--|
| ENSG00000155666 |  |
| ENSG00000224470 |  |
| ENSG00000189266 |  |
| ENSG00000214029 |  |
| ENSG00000236104 |  |
| ENSG00000144791 |  |
| ENSG00000106479 |  |
| ENSG00000148411 |  |
| ENSG00000167548 |  |
| ENSG00000103199 |  |
| ENSG00000137504 |  |
| ENSG00000127528 |  |
| ENSG00000160094 |  |
| ENSG00000102870 |  |
| ENSG00000204713 |  |
| ENSG00000085276 |  |
| ENSG00000085274 |  |
| ENSG00000172530 |  |
| ENSG00000197363 |  |
| ENSG00000197362 |  |
| ENSG00000171295 |  |
