# Supplementary material for: CDK7 inhibitor THZ1 inhibits MCL1 synthesis and drives cholangiocarcinoma apoptosis in combination with BCL2/BCL-XL inhibitor ABT-263
Source: PubMed Central journal article supplement (PMC6688996; doi:10.1038/s41419-019-1831-7), 2019-08-09
Supplement: 41419_2019_1831_MOESM18_ESM.pdf [file 41419_2019_1831_MOESM18_ESM.pdf]

GO analysis of RBE

| transcription, DNA-templated: 431 genes | regulation of transcription, DNA-templated: 347 genes |
|-----------------------------------------|-------------------------------------------------------|
| ENSG00000198521                         | ENSG00000146587                                       |
| ENSG00000131759                         | ENSG00000162086                                       |
| ENSG00000167981                         | ENSG00000198521                                       |
| ENSG00000163995                         | ENSG00000173041                                       |
| ENSG00000099381                         | ENSG00000167981                                       |
| ENSG00000197008                         | ENSG00000161914                                       |
| ENSG00000121413                         | ENSG00000099381                                       |
| ENSG00000124613                         | ENSG00000145908                                       |
| ENSG00000167840                         | ENSG00000197008                                       |
| ENSG00000251369                         | ENSG00000124613                                       |
| ENSG00000171425                         | ENSG00000167840                                       |
| ENSG00000185219                         | ENSG00000251369                                       |
| ENSG00000133740                         | ENSG00000171425                                       |
| ENSG00000184939                         | ENSG00000185219                                       |
| ENSG00000109787                         | ENSG00000168310                                       |
| ENSG00000136870                         | ENSG00000263002                                       |
| ENSG00000197857                         | ENSG00000160679                                       |
| ENSG00000141905                         | ENSG00000184939                                       |
| ENSG00000204366                         | ENSG00000109787                                       |
| ENSG00000156384                         | ENSG00000136870                                       |
| ENSG00000144026                         | ENSG00000189164                                       |
| ENSG00000204920                         | ENSG00000197857                                       |
| ENSG00000136367                         | ENSG00000204366                                       |
| ENSG00000166704                         | ENSG00000149050                                       |
| ENSG00000196092                         | ENSG00000144026                                       |
| ENSG00000139372                         | ENSG00000204920                                       |
| ENSG00000170608                         | ENSG00000136367                                       |
| ENSG00000121406                         | ENSG00000184635                                       |
| ENSG00000196152                         | ENSG00000104221                                       |
| ENSG00000170604                         | ENSG00000188321                                       |
| ENSG00000197016                         | ENSG00000188295                                       |
| ENSG00000106261                         | ENSG00000169955                                       |
| ENSG00000196150                         | ENSG00000178229                                       |
| ENSG00000169951                         | ENSG00000166704                                       |
| ENSG00000197937                         | ENSG00000196092                                       |
| ENSG00000196793                         | ENSG00000153767                                       |
| ENSG00000186496                         | ENSG00000110851                                       |
| ENSG00000198315                         | ENSG00000121406                                       |
| ENSG00000197841                         | ENSG00000196152                                       |
| ENSG00000196693                         | ENSG00000197016                                       |
| ENSG00000061936                         | ENSG00000170604                                       |
| ENSG00000146278                         | ENSG00000106261                                       |
| ENSG00000157429                         | ENSG00000198093                                       |
| ENSG00000197020                         | ENSG00000196150                                       |
| ENSG00000170260                         | ENSG00000169951                                       |
| ENSG00000152926                         | ENSG00000167562                                       |
| ENSG00000197024                         | ENSG00000196793                                       |
| ENSG00000197128                         | ENSG00000197937                                       |
| ENSG00000103343                         | ENSG00000198315                                       |
| ENSG00000173480                         | ENSG00000197841                                       |
| ENSG00000158805                         | ENSG00000196693                                       |
| ENSG00000119574                         | ENSG00000171634                                       |
| ENSG00000197935                         | ENSG00000061936                                       |
| ENSG00000197933                         | ENSG00000143157                                       |
| ENSG00000170265                         | ENSG00000157429                                       |
| ENSG00000186280                         | ENSG00000146278                                       |
| ENSG00000139651                         | ENSG00000197020                                       |
| ENSG00000179627                         | ENSG00000170260                                       |
| ENSG00000198205                         | ENSG00000152926                                       |

|                 |                 |
|-----------------|-----------------|
| ENSG00000198300 | ENSG00000197024 |
| ENSG00000204644 | ENSG00000133619 |
| ENSG00000140265 | ENSG00000197128 |
| ENSG00000196275 | ENSG00000173480 |
| ENSG00000147124 | ENSG00000158805 |
| ENSG00000198604 | ENSG00000119574 |
| ENSG00000204946 | ENSG00000197935 |
| ENSG00000197037 | ENSG00000197933 |
| ENSG00000171448 | ENSG00000170265 |
| ENSG00000204947 | ENSG00000171700 |
| ENSG00000196172 | ENSG00000133250 |
| ENSG00000235109 | ENSG00000186280 |
| ENSG00000225614 | ENSG00000120832 |
| ENSG00000186272 | ENSG00000187187 |
| ENSG00000144802 | ENSG00000139651 |
| ENSG00000170631 | ENSG00000204644 |
| ENSG00000124444 | ENSG00000136574 |
| ENSG00000116668 | ENSG00000177508 |
| ENSG00000197863 | ENSG00000196275 |
| ENSG00000186376 | ENSG00000147124 |
| ENSG00000213096 | ENSG00000160993 |
| ENSG00000196670 | ENSG00000198604 |
| ENSG00000164379 | ENSG00000197037 |
| ENSG00000198807 | ENSG00000171448 |
| ENSG00000186260 | ENSG00000204947 |
| ENSG00000075407 | ENSG00000070495 |
| ENSG00000141040 | ENSG00000196172 |
| ENSG00000196466 | ENSG00000133247 |
| ENSG00000141956 | ENSG00000235109 |
| ENSG00000197044 | ENSG00000225614 |
| ENSG00000121454 | ENSG00000186272 |
| ENSG00000198429 | ENSG00000170631 |
| ENSG00000185252 | ENSG00000168264 |
| ENSG00000005801 | ENSG00000124444 |
| ENSG00000163946 | ENSG00000178386 |
| ENSG00000146243 | ENSG00000147121 |
| ENSG00000171469 | ENSG00000197863 |
| ENSG00000179111 | ENSG00000213096 |
| ENSG00000131849 | ENSG00000186376 |
| ENSG00000125798 | ENSG00000196670 |
| ENSG00000204569 | ENSG00000075407 |
| ENSG00000131848 | ENSG00000196466 |
| ENSG00000251192 | ENSG00000141956 |
| ENSG00000196199 | ENSG00000197044 |
| ENSG00000081386 | ENSG00000158691 |
| ENSG00000196458 | ENSG00000198429 |
| ENSG00000196456 | ENSG00000121454 |
| ENSG00000198551 | ENSG00000187626 |
| ENSG00000180626 | ENSG00000185252 |
| ENSG00000124664 | ENSG00000197566 |
| ENSG00000196867 | ENSG00000178150 |
| ENSG00000155592 | ENSG00000005801 |
| ENSG00000177485 | ENSG00000143995 |
| ENSG00000121903 | ENSG00000163946 |
| ENSG00000223547 | ENSG00000221923 |
| ENSG00000249471 | ENSG00000146243 |
| ENSG00000178764 | ENSG00000108788 |
| ENSG00000101945 | ENSG00000171469 |
| ENSG00000198440 | ENSG00000101096 |
| ENSG00000141026 | ENSG00000161298 |
| ENSG00000156853 | ENSG00000131849 |

|                 |                 |
|-----------------|-----------------|
| ENSG0000087152  | ENSG00000142528 |
| ENSG00000139718 | ENSG00000188785 |
| ENSG00000197062 | ENSG00000205683 |
| ENSG00000186141 | ENSG00000251192 |
| ENSG00000178665 | ENSG00000185278 |
| ENSG00000215421 | ENSG00000118707 |
| ENSG00000179922 | ENSG00000081386 |
| ENSG00000181896 | ENSG00000198182 |
| ENSG00000147789 | ENSG00000131931 |
| ENSG00000198538 | ENSG00000196458 |
| ENSG00000196437 | ENSG00000196456 |
| ENSG00000186130 | ENSG00000112365 |
| ENSG00000048052 | ENSG00000161551 |
| ENSG00000176401 | ENSG00000168564 |
| ENSG00000065029 | ENSG00000134852 |
| ENSG00000136866 | ENSG00000168661 |
| ENSG00000090612 | ENSG00000124160 |
| ENSG00000267508 | ENSG00000198551 |
| ENSG00000166135 | ENSG00000180626 |
| ENSG00000254004 | ENSG00000184677 |
| ENSG00000197497 | ENSG00000245680 |
| ENSG00000181315 | ENSG00000196867 |
| ENSG00000183309 | ENSG00000153207 |
| ENSG00000170954 | ENSG00000121903 |
| ENSG00000121297 | ENSG00000198185 |
| ENSG00000152439 | ENSG00000223547 |
| ENSG00000152433 | ENSG00000249471 |
| ENSG00000198795 | ENSG00000198440 |
| ENSG00000135164 | ENSG00000174586 |
| ENSG00000240225 | ENSG00000156853 |
| ENSG00000152784 | ENSG00000139718 |
| ENSG00000013619 | ENSG00000197062 |
| ENSG00000116833 | ENSG00000118412 |
| ENSG00000188868 | ENSG00000102804 |
| ENSG00000196705 | ENSG00000198298 |
| ENSG00000234602 | ENSG00000188283 |
| ENSG00000152443 | ENSG00000173875 |
| ENSG00000105556 | ENSG00000178665 |
| ENSG00000196417 | ENSG00000237440 |
| ENSG00000163508 | ENSG00000215421 |
| ENSG00000168395 | ENSG00000179922 |
| ENSG00000068654 | ENSG00000181896 |
| ENSG00000174197 | ENSG00000143067 |
| ENSG00000181638 | ENSG00000143970 |
| ENSG00000172977 | ENSG00000103510 |
| ENSG00000142065 | ENSG00000147789 |
| ENSG00000078900 | ENSG00000198538 |
| ENSG00000169184 | ENSG00000176024 |
| ENSG00000108175 | ENSG00000196437 |
| ENSG00000166261 | ENSG00000186130 |
| ENSG00000181450 | ENSG00000171606 |
| ENSG00000218891 | ENSG00000152475 |
| ENSG00000180787 | ENSG00000143373 |
| ENSG00000213799 | ENSG00000187792 |
| ENSG00000185670 | ENSG00000172888 |
| ENSG00000204859 | ENSG00000115568 |
| ENSG00000012504 | ENSG00000176401 |
| ENSG00000198890 | ENSG00000114853 |
| ENSG00000181666 | ENSG00000136866 |
| ENSG00000189298 | ENSG00000196700 |
| ENSG00000118263 | ENSG00000267508 |

|                 |                 |
|-----------------|-----------------|
| ENSG00000213588 | ENSG00000090612 |
| ENSG00000112561 | ENSG00000077150 |
| ENSG00000182973 | ENSG00000064932 |
| ENSG00000171574 | ENSG00000254004 |
| ENSG00000010539 | ENSG00000197497 |
| ENSG00000189079 | ENSG00000181315 |
| ENSG00000172273 | ENSG00000183309 |
| ENSG00000169981 | ENSG00000170954 |
| ENSG00000173276 | ENSG00000172171 |
| ENSG00000173275 | ENSG00000143498 |
| ENSG00000171161 | ENSG00000125945 |
| ENSG00000129173 | ENSG00000152439 |
| ENSG00000011258 | ENSG00000152433 |
| ENSG00000172819 | ENSG00000175197 |
| ENSG00000179588 | ENSG00000166526 |
| ENSG00000103460 | ENSG00000198795 |
| ENSG00000172006 | ENSG00000135164 |
| ENSG00000197782 | ENSG00000125846 |
| ENSG00000174282 | ENSG00000240225 |
| ENSG00000196757 | ENSG00000083817 |
| ENSG00000261221 | ENSG00000152784 |
| ENSG00000182986 | ENSG00000083812 |
| ENSG00000196653 | ENSG00000116833 |
| ENSG00000196652 | ENSG00000196812 |
| ENSG00000166188 | ENSG00000188868 |
| ENSG00000105497 | ENSG00000196705 |
| ENSG00000122386 | ENSG00000198482 |
| ENSG00000116580 | ENSG00000185697 |
| ENSG00000075891 | ENSG00000198346 |
| ENSG00000136944 | ENSG00000168795 |
| ENSG00000132005 | ENSG00000152443 |
| ENSG00000197385 | ENSG00000105556 |
| ENSG00000152795 | ENSG00000172748 |
| ENSG00000112584 | ENSG00000180855 |
| ENSG00000148297 | ENSG00000242779 |
| ENSG00000087095 | ENSG00000196417 |
| ENSG00000197279 | ENSG00000111596 |
| ENSG00000155666 | ENSG00000196345 |
| ENSG00000224470 | ENSG00000198879 |
| ENSG00000189266 | ENSG00000174197 |
| ENSG00000100395 | ENSG00000083828 |
| ENSG00000214029 | ENSG00000256771 |
| ENSG00000106479 | ENSG00000198155 |
| ENSG00000204611 | ENSG00000138073 |
| ENSG00000148411 | ENSG00000177045 |
| ENSG00000103199 | ENSG00000181638 |
| ENSG00000181690 | ENSG00000137185 |
| ENSG00000234284 | ENSG00000130544 |
| ENSG00000012048 | ENSG00000155760 |
| ENSG00000137504 | ENSG00000256087 |
| ENSG00000103449 | ENSG00000196214 |
| ENSG00000102870 | ENSG00000178935 |
| ENSG00000160094 | ENSG00000172977 |
| ENSG00000204713 | ENSG00000142065 |
| ENSG00000171291 | ENSG00000256294 |
| ENSG00000197363 | ENSG00000203326 |
| ENSG00000189180 | ENSG00000180884 |
| ENSG00000197362 | ENSG00000127663 |
| ENSG00000171295 | ENSG00000198169 |
| ENSG00000162086 | ENSG00000179943 |
| ENSG00000146587 | ENSG00000167395 |

|                 |                 |
|-----------------|-----------------|
| ENSG00000173041 | ENSG00000169184 |
| ENSG00000168826 | ENSG00000198039 |
| ENSG00000161914 | ENSG00000198464 |
| ENSG00000145908 | ENSG00000186814 |
| ENSG00000263002 | ENSG00000198466 |
| ENSG00000189164 | ENSG00000186812 |
| ENSG00000173894 | ENSG00000181450 |
| ENSG00000149050 | ENSG00000167785 |
| ENSG00000184635 | ENSG00000079999 |
| ENSG00000163320 | ENSG00000218891 |
| ENSG00000188321 | ENSG00000180787 |
| ENSG00000188295 | ENSG00000213799 |
| ENSG00000178229 | ENSG00000185670 |
| ENSG00000148606 | ENSG00000204859 |
| ENSG00000198093 | ENSG00000100105 |
| ENSG00000167562 | ENSG00000118260 |
| ENSG00000154222 | ENSG00000181666 |
| ENSG00000184436 | ENSG00000213588 |
| ENSG00000119866 | ENSG00000081189 |
| ENSG00000171634 | ENSG00000112561 |
| ENSG00000133250 | ENSG00000182973 |
| ENSG00000056277 | ENSG00000171574 |
| ENSG00000120832 | ENSG00000177873 |
| ENSG00000187187 | ENSG00000010539 |
| ENSG00000177508 | ENSG00000189079 |
| ENSG00000160993 | ENSG00000148300 |
| ENSG00000070495 | ENSG00000172273 |
| ENSG00000068024 | ENSG00000169981 |
| ENSG00000133247 | ENSG00000078246 |
| ENSG00000162702 | ENSG00000173276 |
| ENSG00000168264 | ENSG00000171161 |
| ENSG00000178386 | ENSG00000196378 |
| ENSG00000168062 | ENSG00000173275 |
| ENSG00000058600 | ENSG00000167635 |
| ENSG00000143458 | ENSG00000011258 |
| ENSG00000158691 | ENSG00000185730 |
| ENSG00000187626 | ENSG00000063438 |
| ENSG00000184402 | ENSG00000172006 |
| ENSG00000197566 | ENSG00000197782 |
| ENSG00000178150 | ENSG00000198105 |
| ENSG00000123411 | ENSG00000256229 |
| ENSG00000108788 | ENSG00000196757 |
| ENSG00000161298 | ENSG00000186446 |
| ENSG00000188785 | ENSG00000125618 |
| ENSG00000205683 | ENSG00000182986 |
| ENSG00000185278 | ENSG00000196653 |
| ENSG00000118707 | ENSG00000124459 |
| ENSG00000198182 | ENSG00000166188 |
| ENSG00000131931 | ENSG00000196652 |
| ENSG00000112365 | ENSG00000186448 |
| ENSG00000161551 | ENSG00000180035 |
| ENSG00000065526 | ENSG00000105497 |
| ENSG00000125812 | ENSG00000167232 |
| ENSG00000168661 | ENSG00000186300 |
| ENSG00000124160 | ENSG00000122386 |
| ENSG00000134852 | ENSG00000140987 |
| ENSG00000184677 | ENSG00000167034 |
| ENSG00000245680 | ENSG00000167625 |
| ENSG00000105662 | ENSG00000075891 |
| ENSG00000198185 | ENSG00000136944 |
| ENSG00000198081 | ENSG00000185591 |

|                 |                 |
|-----------------|-----------------|
| ENSG00000101076 | ENSG00000197385 |
| ENSG00000174586 | ENSG00000123095 |
| ENSG00000118412 | ENSG00000105997 |
| ENSG00000198298 | ENSG00000167554 |
| ENSG00000100413 | ENSG00000152795 |
| ENSG00000188283 | ENSG00000112584 |
| ENSG00000173875 | ENSG00000124201 |
| ENSG00000237440 | ENSG00000111424 |
| ENSG00000143067 | ENSG00000196357 |
| ENSG00000143970 | ENSG00000087095 |
| ENSG00000103510 | ENSG00000123636 |
| ENSG00000143379 | ENSG00000149948 |
| ENSG00000176024 | ENSG00000197279 |
| ENSG00000164916 | ENSG00000196391 |
| ENSG00000205659 | ENSG00000187801 |
| ENSG00000171606 | ENSG00000089335 |
| ENSG00000152475 | ENSG00000189266 |
| ENSG00000187792 | ENSG00000100395 |
| ENSG00000143373 | ENSG00000144791 |
| ENSG00000167685 | ENSG00000214029 |
| ENSG00000172888 | ENSG00000236104 |
| ENSG00000115568 | ENSG00000106479 |
| ENSG00000114853 | ENSG00000164011 |
| ENSG00000196700 | ENSG00000204611 |
| ENSG00000064932 | ENSG00000103199 |
| ENSG00000128908 | ENSG00000167548 |
| ENSG00000100201 | ENSG00000234284 |
| ENSG00000125945 | ENSG00000128000 |
| ENSG00000256060 | ENSG00000127989 |
| ENSG00000178951 | ENSG00000136630 |
| ENSG00000175197 | ENSG00000204514 |
| ENSG00000168517 | ENSG00000196263 |
| ENSG00000166526 | ENSG00000102870 |
| ENSG00000125846 | ENSG00000160094 |
| ENSG00000204304 | ENSG00000180938 |
| ENSG00000198146 | ENSG00000085276 |
| ENSG00000083817 | ENSG00000085274 |
| ENSG00000083812 | ENSG00000171291 |
| ENSG00000083814 | ENSG00000118513 |
| ENSG00000196812 | ENSG00000197363 |
| ENSG00000198482 | ENSG00000189180 |
| ENSG00000198346 | ENSG00000197362 |
| ENSG00000168795 | ENSG00000171295 |
| ENSG00000172748 | ENSG00000187815 |
| ENSG00000165671 |                 |
| ENSG00000180855 |                 |
| ENSG00000242779 |                 |
| ENSG00000213024 |                 |
| ENSG00000111596 |                 |
| ENSG00000196345 |                 |
| ENSG00000111087 |                 |
| ENSG00000066135 |                 |
| ENSG00000083828 |                 |
| ENSG00000256771 |                 |
| ENSG00000198155 |                 |
| ENSG00000215271 |                 |
| ENSG00000138073 |                 |
| ENSG00000119608 |                 |
| ENSG00000177045 |                 |
| ENSG00000137185 |                 |
| ENSG00000130544 |                 |

|                 |  |
|-----------------|--|
| ENSG00000256087 |  |
| ENSG00000196214 |  |
| ENSG00000178935 |  |
| ENSG00000149308 |  |
| ENSG00000256294 |  |
| ENSG00000180884 |  |
| ENSG00000203326 |  |
| ENSG00000083838 |  |
| ENSG00000127663 |  |
| ENSG00000198169 |  |
| ENSG00000179943 |  |
| ENSG00000167395 |  |
| ENSG00000198039 |  |
| ENSG00000198464 |  |
| ENSG00000186814 |  |
| ENSG00000198466 |  |
| ENSG00000186812 |  |
| ENSG00000167785 |  |
| ENSG00000079999 |  |
| ENSG00000100105 |  |
| ENSG00000081189 |  |
| ENSG00000177873 |  |
| ENSG00000196378 |  |
| ENSG00000185730 |  |
| ENSG00000063438 |  |
| ENSG00000183741 |  |
| ENSG00000105866 |  |
| ENSG00000198105 |  |
| ENSG00000256229 |  |
| ENSG00000167528 |  |
| ENSG00000153922 |  |
| ENSG00000186446 |  |
| ENSG00000178919 |  |
| ENSG00000125618 |  |
| ENSG00000186448 |  |
| ENSG00000180035 |  |
| ENSG00000167232 |  |
| ENSG00000186300 |  |
| ENSG00000140987 |  |
| ENSG00000167034 |  |
| ENSG00000167625 |  |
| ENSG00000164749 |  |
| ENSG00000176182 |  |
| ENSG00000166886 |  |
| ENSG00000049246 |  |
| ENSG00000177853 |  |
| ENSG00000105997 |  |
| ENSG00000123095 |  |
| ENSG00000167554 |  |
| ENSG00000111424 |  |
| ENSG00000196357 |  |
| ENSG00000123636 |  |
| ENSG00000196391 |  |
| ENSG00000187801 |  |
| ENSG00000089335 |  |
| ENSG00000144791 |  |
| ENSG00000236104 |  |
| ENSG00000167548 |  |
| ENSG00000128000 |  |
| ENSG00000136630 |  |
| ENSG00000127528 |  |

|                 |  |
|-----------------|--|
| ENSG00000196263 |  |
| ENSG00000180938 |  |
| ENSG00000085276 |  |
| ENSG00000085274 |  |
| ENSG00000172530 |  |
| ENSG00000187815 |  |
